# Supplementary material
Source: PubMed Central journal article supplement (PMC10527414)
Supplement: NIHMS1907442-supplement-Supplemental_Publication_Material.pdf [file NIHMS1907442-supplement-Supplemental_Publication_Material.pdf]

## Online Only Supplemental Material

Traumatic Brain Injury and Long-Term Risk of Stroke Among U.S. Military Veterans

Andrea L.C. Schneider MD PhD, Carrie B. Peltz PhD, Yixia Li MPH, Amber Bahorik PhD,  
Raquel C. Gardner MD, Kristine Yaffe MD

### Table of Contents

|                                                                                                                                       |   |
|---------------------------------------------------------------------------------------------------------------------------------------|---|
| Supplemental Figure 1. Participant Flow Diagram .....                                                                                 | 2 |
| Supplemental Table 1. Stroke ICD Codes .....                                                                                          | 3 |
| Supplemental Table 2. Risk of Stroke by Traumatic Brain Injury (TBI) Status, Adding Adjustment for Index Date as Covariate .....      | 4 |
| Supplemental Table 3. Risk of Stroke by Traumatic Brain Injury (TBI) Status, Accounting for the Variation Between Matched Pairs ..... | 5 |

Supplemental Figure 1. Participant Flow Diagram.

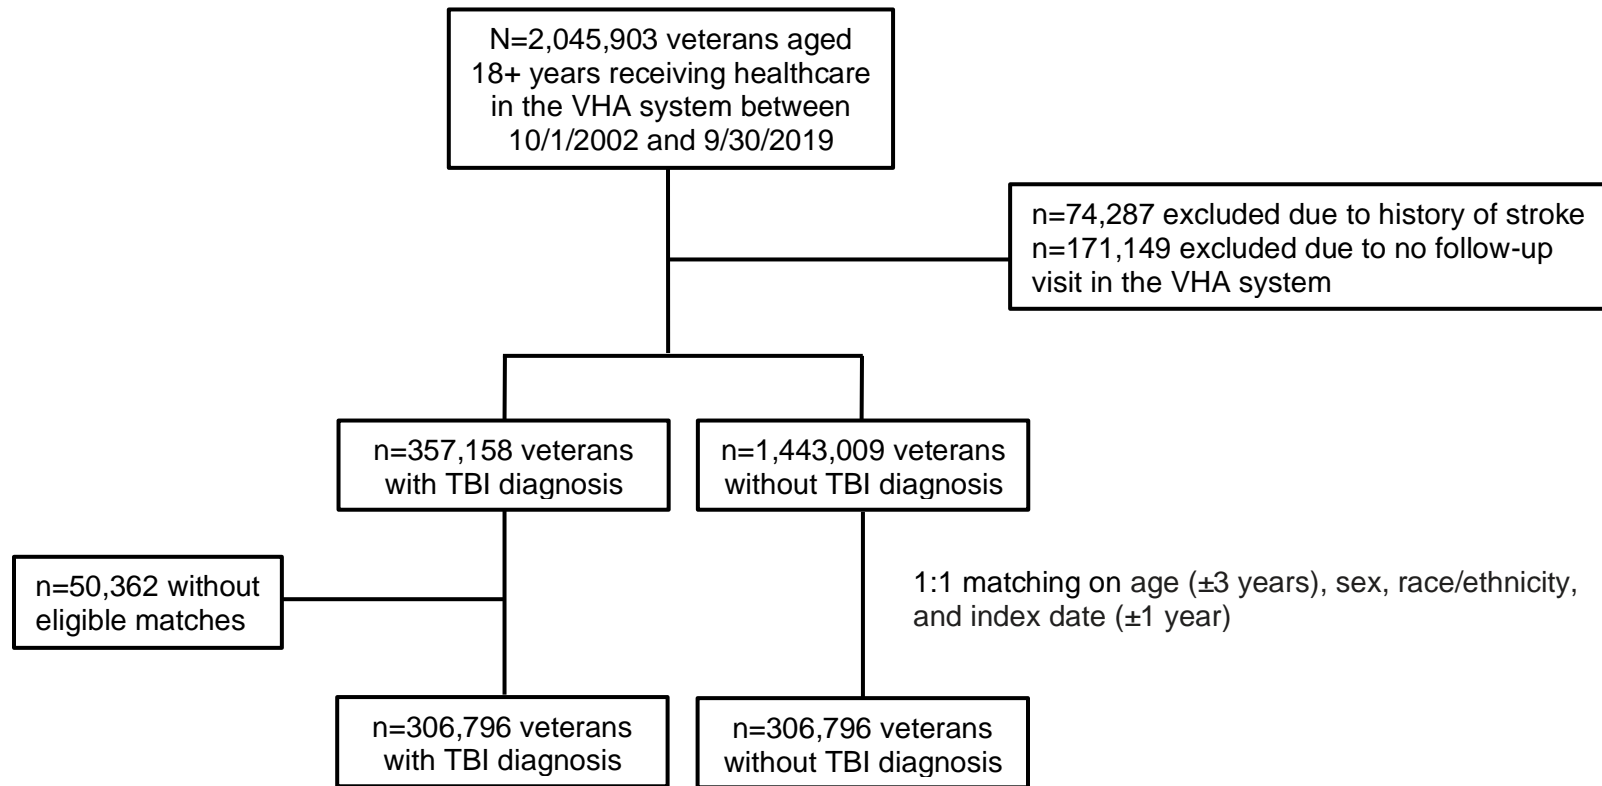

Supplemental Table 1. Stroke ICD Codes.

|                    | ICD-9 Codes                                                                                                                                                                                                                                                                                                                                                                 | ICD-10 Codes                                                                                                                                                                                                                                                                                                                                                                                                                 |
|--------------------|-----------------------------------------------------------------------------------------------------------------------------------------------------------------------------------------------------------------------------------------------------------------------------------------------------------------------------------------------------------------------------|------------------------------------------------------------------------------------------------------------------------------------------------------------------------------------------------------------------------------------------------------------------------------------------------------------------------------------------------------------------------------------------------------------------------------|
| Ischemic Stroke    | 362.30 – Retinal vascular occlusion, unspecified<br>362.31 – Central retinal artery occlusion<br>362.32 – Retinal artery branch occlusion<br>362.33 – Partial retinal artery occlusion<br>433.x1 – Occlusion and stenosis of precerebral arteries<br>434.x1 – Occlusion, thrombosis, embolism of cerebral arteries<br>436 – Acute, but ill-defined, cerebrovascular disease | H34.1x – Central retinal artery occlusion<br>H34.2x – Other retinal artery occlusions<br>H34.23x – Other retinal artery occlusions<br>I63.x – Cerebral infarction due to thrombosis, embolism, occlusion, or stenosis of artery<br>I63.xx – Cerebral infarction due to thrombosis, embolism, occlusion, or stenosis of artery<br>I63.xxx – Cerebral infarction due to thrombosis, embolism, occlusion, or stenosis of artery |
| Hemorrhagic Stroke | 430 – Subarachnoid hemorrhage<br>431 – Intracerebral hemorrhage                                                                                                                                                                                                                                                                                                             | I60.x – Subarachnoid hemorrhage<br>I60.xx – Subarachnoid hemorrhage<br>I61.x – Intracerebral hemorrhage                                                                                                                                                                                                                                                                                                                      |

Supplemental Table 2. Risk of Stroke by Traumatic Brain Injury (TBI) Status, Adding Adjustment for Index Date as Covariate.

|                                                             | Veterans Without TBI | Veterans With TBI  |
|-------------------------------------------------------------|----------------------|--------------------|
| <b>Any Stroke</b>                                           |                      |                    |
| No. Events / No. PYs                                        | 10,297 / 1,811,490   | 18,435 / 1,787,238 |
| Unadjusted Incidence Rate per 1,000 PYs (95% CI)            | 5.7 (5.4-6.0)        | 10.3 (10.0-10.7)   |
| Adjusted* Cox proportional hazards model, HR (95% CI)       | 1 (Reference)        | 1.81 (1.76-1.85)   |
| Adjusted* Fine-Gray proportional hazards model, HR (95% CI) | 1 (Reference)        | 1.67 (1.63-1.72)   |
| <b>Ischemic Stroke</b>                                      |                      |                    |
| No. Events / No. PYs                                        | 9,924 / 1,812,455    | 16,645 / 1,795,283 |
| Unadjusted Incidence Rate per 1,000 PYs (95% CI)            | 5.5 (5.2-5.7)        | 9.3 (8.9-9.6)      |
| Adjusted* Cox proportional hazards model, HR (95% CI)       | 1 (Reference)        | 1.68 (1.63-1.72)   |
| Adjusted* Fine-Gray proportional hazards model, HR (95% CI) | 1 (Reference)        | 1.55 (1.51-1.59)   |
| <b>Hemorrhagic Stroke</b>                                   |                      |                    |
| No. Events / No. PYs                                        | 660 / 1,848,365      | 2,603 / 1,851,144  |
| Unadjusted Incidence Rate per 1,000 PYs (95% CI)            | 0.4 (0.3-0.4)        | 1.4 (1.3-1.5)      |
| Adjusted* Cox proportional hazards model, HR (95% CI)       | 1 (Reference)        | 3.92 (3.58-4.29)   |
| Adjusted* Fine-Gray proportional hazards model, HR (95% CI) | 1 (Reference)        | 3.66 (3.34-4.00)   |

Abbreviations: No., number; PYs, person years; HR, hazard ratio

\*Model adjusted for demographics (age, sex, race/ethnicity, income, education, and current smoking), medical comorbidities (hypertension, hyperlipidemia, diabetes, coronary artery disease, and atrial fibrillation), psychiatric comorbidities (post-traumatic stress disorder and depression), and index date.

Supplemental Table 3. Risk of Stroke by Traumatic Brain Injury (TBI) Status, Accounting for the Variation Between Matched Pairs.

|                                                                                                                                                                            | Veterans Without TBI | Veterans With TBI  |
|----------------------------------------------------------------------------------------------------------------------------------------------------------------------------|----------------------|--------------------|
| <b>Any Stroke</b>                                                                                                                                                          |                      |                    |
| No. Events / No. PYs                                                                                                                                                       | 10,297 / 1,811,490   | 18,435 / 1,787,238 |
| Unadjusted Incidence Rate per 1,000 PYs (95% CI)                                                                                                                           | 5.7 (5.4-6.0)        | 10.3 (10.0-10.7)   |
| Adjusted* Cox proportional hazards shared-frailty model, HR (95% CI)                                                                                                       | 1 (Reference)        | 1.78 (1.74-1.83)   |
| Adjusted* Cox proportional hazards shared-frailty model using methods described by Wolber et al <sup>1,2</sup> to account for the competing risk of mortality, HR (95% CI) | 1 (Reference)        | 1.62 (1.58-1.67)   |
| <b>Ischemic Stroke</b>                                                                                                                                                     |                      |                    |
| No. Events / No. PYs                                                                                                                                                       | 9,924 / 1,812,455    | 16,645 / 1,795,283 |
| Unadjusted Incidence Rate per 1,000 PYs (95% CI)                                                                                                                           | 5.5 (5.2-5.7)        | 9.3 (8.9-9.6)      |
| Adjusted* Cox proportional hazards shared-frailty model, HR (95% CI)                                                                                                       | 1 (Reference)        | 1.66 (1.61-1.70)   |
| Adjusted* Cox proportional hazards shared-frailty model using methods described by Wolber et al <sup>1,2</sup> to account for the competing risk of mortality, HR (95% CI) | 1 (Reference)        | 1.50 (1.47-1.55)   |
| <b>Hemorrhagic Stroke</b>                                                                                                                                                  |                      |                    |
| No. Events / No. PYs                                                                                                                                                       | 660 / 1,848,365      | 2,603 / 1,851,144  |
| Unadjusted Incidence Rate per 1,000 PYs (95% CI)                                                                                                                           | 0.4 (0.3-0.4)        | 1.4 (1.3-1.5)      |
| Adjusted* Cox proportional hazards shared-frailty model, HR (95% CI)                                                                                                       | 1 (Reference)        | 3.85 (3.51-4.20)   |
| Adjusted* Cox proportional hazards shared-frailty model using methods described by Wolber et al <sup>1,2</sup> to account for the competing risk of mortality, HR (95% CI) | 1 (Reference)        | 3.58 (3.28-3.92)   |

Abbreviations: No., number; PYs, person years; HR, hazard ratio

\*Model adjusted for demographics (age, sex, race/ethnicity, income, education, and current smoking), medical comorbidities (hypertension, hyperlipidemia, diabetes, coronary artery disease, and atrial fibrillation) and psychiatric comorbidities (post-traumatic stress disorder and depression).

References:

<sup>1</sup>Wolbers M, Koller MT, Wittelman JC, Steyerberg EW. Prognostic models with competing risks: methods and application to coronary risk prediction. *Epidemiology*. Jul 2009;20(4):555-61. doi:10.1097/EDE.0b013e3181a39056.

<sup>2</sup>Wolbers M, Blanche P, Koller MT, Wittelman JC, Gerds TA. Concordance for prognostic models with competing risks. *Biostatistics*. Jul 2014;15(3):526-39. doi:10.1093/biostatistics/kxt059.
